# Supplementary material for: Synovial Fluid Regulates the Gene Expression of a Pattern of microRNA via the NF-κB Pathway: An In Vitro Study on Human Osteoarthritic Chondrocytes
Source: MDPI journal article supplement (doi:10.3390/ijms23158334), 2022-07-28
Supplement: s1 [file s1]

**Table S1.** Demographic, clinical, and laboratory features of patients and healthy controls, who served as donors of SF samples.

| Characteristic                                       | RA         | OA          | HC        |
|------------------------------------------------------|------------|-------------|-----------|
| Patients, n                                          | 4          | 4           | 4         |
| Age, years                                           | 56 ± 1.73  | 66 ± 3.36   | 33 ± 2.38 |
| Gender, female/male                                  | 3/1        | 2/2         | 1/3       |
| Duration, years                                      | 5 ± 1.70   | 7 ± 1.5     |           |
| <b>Laboratory features</b>                           |            |             |           |
| RF, positive, n (%)                                  | 4 (100)    | 0 (0)       |           |
| Anti-CCP, positive, n (%)                            | 4 (100)    | 0 (0)       |           |
| CRP (mg/dL)                                          | 3.75 ± 2.8 | 0.9 ± 0.35  |           |
| ESR (mm/h)                                           | 47 ± 9.39  | 27.5 ± 6.45 |           |
| <b>Disease activity score</b>                        |            |             |           |
| DAS28-ESR                                            | 3.3 ± 0.3  | /           |           |
| <b>K-L score</b>                                     | /          |             |           |
| II                                                   |            | 3           |           |
| III                                                  |            | 1           |           |
| <b>Treatment</b>                                     |            |             |           |
| NSAIDs, n (%)                                        | 4 (100)    | 3 (75)      | 2 (50)    |
| Acetaminophen, n (%)                                 | 1 (25)     | 1 (25)      | 2 (50)    |
| Glucocorticoid (<10 mg prednisone/day or equivalent) | 0 (0)      | 4 (100)     |           |

Values are expressed as media ± standard deviation, except where indicated otherwise.

*Abbreviations:* RA = rheumatoid factor; OA = osteoarthritis; HC = healthy controls; RF = rheumatoid factor; Anti-CCP = anti-cyclic citrullinated peptide antibody; CRP = C-reactive protein; ESR = erythrocyte sedimentation rate; SF = synovial fluid; DAS28 = disease activity score of 28 joints; NSAIDs = non-steroidal anti-inflammatory drugs.
