# Supplementary material for: Synovial Fluid Regulates the Gene Expression of a Pattern of microRNA via the NF-κB Pathway: An In Vitro Study on Human Osteoarthritic Chondrocytes
Source: MDPI journal article supplement (doi:10.3390/ijms23158334), 2022-07-28
Supplement: s1 [file s1]

| Table S2. List of primers used for quantitative real time PCR. |                   |
|----------------------------------------------------------------|-------------------|
| Genes                                                          | Cat. No. (Qiagen) |
| <i>IL-1<math>\beta</math></i>                                  | QT00021385        |
| <i>IL-6</i>                                                    | QT00083720        |
| <i>TNF-<math>\alpha</math></i>                                 | QT00029162        |
| <i>MMP-1</i>                                                   | QT00014581        |
| <i>MMP-13</i>                                                  | QT00001764        |
| <i>ADAMTS-5</i>                                                | QT00011088        |
| <i>Col2a1</i>                                                  | QT00049518        |
| <i>BCL2</i>                                                    | QT00000721        |
| <i>SOD-2</i>                                                   | QT01008693        |
| <i>NRF2</i>                                                    | QT00027384        |
| <i>NFKB1</i>                                                   | QT00063791        |
| <i>RELA</i>                                                    | QT01007370        |
| <i>ACTB</i>                                                    | QT00095431        |
| <i>miR-34a</i>                                                 | MS00003318        |
| <i>miR-146a</i>                                                | MS00003535        |
| <i>miR-155</i>                                                 | MS00031486        |
| <i>miR-181a</i>                                                | MS00006692        |
| <i>SNORD-25</i>                                                | MS00014007        |

Abbreviations: *IL-1 $\beta$*  = interleukin 1 $\beta$ , *IL-6* = interleukin 6, *TNF- $\alpha$*  = tumor necrosis factor  $\alpha$ , *MMP-1* = metalloproteinase 1, *MMP-13* = metalloproteinase 13, *ADAMTS-5* = metalloproteinase with thrombospondin motif, *Col2a1* = type II collagen, *BCL2* = B-cell lymphoma 2, *SOD-2* = superoxide dismutase 2, *NRF2* = nuclear factor erythroid 2 like 2, *NFKB1* = Nuclear Factor Kappa B Subunit 1 (p50), *RELA* = Proto-Oncogene, NF-KB Subunit (p65), *ACTB* = Actin Beta, *miR* = microRNA, *SNORD-25* = Small Nucleolar RNA, C/D Box 25.
